# Supplementary material
Source: PubMed Central journal article supplement (PMC3705629)
Supplement: 97320630009528S1.pdf [file 97320630009528S1.pdf]

## Supplementary material:

**Table 1: Genome annotation statistics.** The overall statistical prediction shows the nucleotidic composition of the genes and the pseudomolecule built for the annotation process. A total of 1,204 genes were predicted, with an average length of 1,037 nt.

| Genome annotation statistics   |                        |                |
|--------------------------------|------------------------|----------------|
|                                | Genes predicted (1204) | Pseudomolecule |
| Number of bases                | 1249098                | 2467130        |
| A composition                  | 29.58%                 | 29.39%         |
| C composition                  | 20.39%                 | 20.92%         |
| G composition                  | 22.90%                 | 19.73%         |
| T composition                  | 27.11%                 | 29.64%         |
| N composition                  | 0.00%                  | 0.29%          |
| GC percentage                  | 43.30%                 | 40.65%         |
| Gene density in pseudomolecule | 0.488 genes per kb     |                |
| Average gene length            | 1037                   |                |

**Table 2: Functional annotation of *Avibacterium paragallinarum*.** This table shows 8 major categories and 49 sub-categories assigned to the annotated genes. These categories correspond to the general Cluster of Orthologous Genes functional categories.

| Functional annotation of <i>Avibacterium paragallinarum</i> |                                               |                                        |     |
|-------------------------------------------------------------|-----------------------------------------------|----------------------------------------|-----|
| Major Functions                                             | Categories by Gene Ontology                   | Number of sequences                    |     |
| Biological process                                          | metabolic process                             | 585                                    |     |
|                                                             | cellular process                              | 557                                    |     |
|                                                             | localization                                  | 126                                    |     |
|                                                             | response to stimulus                          | 58                                     |     |
|                                                             | cellular component organization or biogenesis | 59                                     |     |
|                                                             | biological regulation                         | 85                                     |     |
|                                                             | carbon utilization                            | 3                                      |     |
|                                                             | signaling                                     | 4                                      |     |
|                                                             | multi-organism process                        | 3                                      |     |
|                                                             | developmental process                         | 14                                     |     |
|                                                             | biological adhesion                           | 1                                      |     |
|                                                             | Cellular process                              | metabolic phosphorus metabolic process | 59  |
|                                                             |                                               | heterocycle metabolic process          | 120 |
| generation of precursor metabolites and energy              |                                               | 33                                     |     |
| cofactor metabolic process                                  |                                               | 50                                     |     |
| cellular aromatic compound metabolic process                |                                               | 35                                     |     |
| sulfur compound metabolic process                           |                                               | 13                                     |     |
| photosynthesis                                              |                                               | 2                                      |     |
| peptide metabolic process                                   |                                               | 3                                      |     |
| Metabolic process                                           |                                               | primary metabolic process              | 475 |
|                                                             |                                               | oxidation-reduction process            | 103 |
|                                                             | macromolecule metabolic process               | 282                                    |     |
|                                                             | biosynthetic process                          | 294                                    |     |
|                                                             | small molecule metabolic process              | 276                                    |     |
|                                                             | nitrogen compound metabolic process           | 340                                    |     |

|                                                    |                                                    |    |
|----------------------------------------------------|----------------------------------------------------|----|
|                                                    | catabolic process                                  | 78 |
|                                                    | organophosphate metabolic process                  | 14 |
| <b>Cellular amino acid metabolic process</b>       | glutamine family amino acid metabolic process      | 18 |
|                                                    | branched chain family amino acid metabolic process | 8  |
|                                                    | aspartate family amino acid metabolic process      | 12 |
|                                                    | histidine family amino acid metabolic process      | 10 |
|                                                    | amino acid activation                              | 13 |
|                                                    | serine family amino acid metabolic process         | 5  |
|                                                    | cellular modified amino acid metabolic process     | 7  |
| <b>tRNA aminoacylation for protein translation</b> | aspartyl-tRNA aminoacylation                       | 3  |
|                                                    | phenylalanyl-tRNA aminoacylation                   | 2  |
|                                                    | lysyl-tRNA aminoacylation                          | 2  |
|                                                    | glutamyl-tRNA aminoacylation                       | 1  |
|                                                    | glutamyl-tRNA aminoacylation                       | 1  |
|                                                    | arginyl-tRNA aminoacylation                        | 1  |
|                                                    | asparaginyl-tRNA aminoacylation                    | 1  |
| <b>Transport</b>                                   | organic substance transport                        | 40 |
|                                                    | ion transport                                      | 29 |
|                                                    | nitrogen compound transport                        | 10 |
|                                                    | cofactor transport                                 | 3  |
|                                                    | secretion                                          | 4  |
| <b>Nucleotide metabolic process</b>                | ribonucleotide metabolic process                   | 43 |
| <b>Amino acid transport</b>                        | aromatic amino acid transport                      | 3  |
|                                                    | branched-chain aliphatic amino acid transport      | 1  |

**Table 3: Virulence factors of *Avibacterium paragallinarum*.** Full list of virulence factors (103) found in *Avibacterium paragallinarum*, with at least 60% of identity with VFDB. A short description of their functions is provided, according the information obtained by the annotation process.

### Virulence factors of *Avibacterium paragallinarum*

| Virulence Factor | Short Description                                                                                                          |
|------------------|----------------------------------------------------------------------------------------------------------------------------|
| algU             | alginate biosynthesis protein AlgZ/FimS                                                                                    |
| bexA             | ATP-dependent polysaccharide export protein                                                                                |
| bexB             | Capsular polysaccharide export protein                                                                                     |
| bexC             | Capsular polysaccharide export protein                                                                                     |
| bexD             | Capsular polysaccharide export protein                                                                                     |
| clpE             | ATP-dependent protease                                                                                                     |
| clpP             | ATP-dependent Clp protease proteolytic subunit                                                                             |
| clpV1            | Required for secretion of hcp1 probably by providing the energy source for its translocation                               |
| comE/pilQ        | competence protein E, type IV pilus secretin PilQ                                                                          |
| cpsG             | phosphomannomutase                                                                                                         |
| csrA             | Binds to mRNA to regulate post-transcriptional activity. Regulates glycogen synthesis and cell size and surface properties |
| ctrB             | Membrane fusion protein, capsular polysaccharide export                                                                    |
| ctrC             | capsule polysaccharide export inner-membrane protein                                                                       |
| ctrD             | capsule polysaccharide export ATP-binding protein                                                                          |
| cyaB             | Involved in the export of calmodulin-sensitive adenylate cyclase-hemolysin (cyclolysin)                                    |
| eno              | phosphopyruvate hydratase, putative enolase                                                                                |
| fcl              | putative fucose synthetase                                                                                                 |
| fur              | transcriptional repressor of iron-responsive genes (Fur family) (ferric uptake regulator)                                  |
| galE             | UDP-glucose 4-epimerase                                                                                                    |

|                       |                                                                                                 |
|-----------------------|-------------------------------------------------------------------------------------------------|
| galU                  | UTP--glucose-1-phosphate uridylyltransferase, carbon storage regulator, argininosuccinate lyase |
| glnA1                 | glutamine synthetase                                                                            |
| gmd                   | GDP-D-mannose dehydratase                                                                       |
| gmhA/lpcA             | phosphoheptose isomerase                                                                        |
| hasB                  | UDP-glucose 6-dehydrogenase                                                                     |
| hemA                  | glutamyl-tRNA reductase                                                                         |
| hemB                  | porphobilinogen synthase                                                                        |
| hemC                  | hydroxymethylbilane synthase, porphobilinogen deaminase                                         |
| hemE                  | uroporphyrinogen decarboxylase                                                                  |
| hemH                  | ferrochelatase                                                                                  |
| hemL                  | glutamate-1-semialdehyde-2,1-aminomutase, aminotransferase                                      |
| hemN                  | oxygen-independent coproporphyrinogen III oxidase                                               |
| hemX                  | phosphate-starvation-inducible protein PsiE, putative uroporphyrin-III C-methyltransferase      |
| hemY                  | porphyrin biosynthesis protein                                                                  |
| hlyB                  | hemolysin transport-secretion protein, alpha-hemolysin translocation ATP-binding protein        |
| hlyD                  | HlyD protein                                                                                    |
| hscA                  | Transport of secretory b polysaccharide accors the outer membrane                               |
| hscB                  | Transport of secretory b polysaccharide accors the outer membrane                               |
| htpB                  | Hsp60, 60kDa heat shock protein, chaperonin                                                     |
| htrB                  | lipid A biosynthesis lauroyl acyltransferase                                                    |
| hxC                   | heme-hemopexin utilization protein C                                                            |
| iga                   | IgA1 protease, specific serine endopeptidase, specific metalloendopeptidase                     |
| intT1                 | Tn21 integrase IntI1                                                                            |
| IS1016                | Insertion sequence                                                                              |
| kdsA                  | 2-dehydro-3-deoxyphosphooctonate aldolase                                                       |
| kdtA                  | 3-deoxy-D-manno-octulosonic-acid transferase                                                    |
| kdtB                  | lipopolysaccharide core biosynthesis protein                                                    |
| kfiD                  | putative UDP-glucose 6-dehydrogenase                                                            |
| kpsF                  | arabinose-5-phosphate isomerase                                                                 |
| lap                   | alcohol-acetaldehyde dehydrogenase                                                              |
| lgtF                  | UDP-glucose--lipooligosaccharide glucosyltransferase                                            |
| lipA                  | capsule polysaccharide modification protein LipA                                                |
| lipB                  | capsule polysaccharide modification protein                                                     |
| lpxA                  | acyl-(acyl-carrier-protein)--UDP-N-acetylglucosamine O-acyltransferase                          |
| lpxB                  | lipid-A-disaccharide synthase                                                                   |
| lpxC                  | UDP-3-O-[3-hydroxymyristoyl] N-acetylglucosamine deacetylase                                    |
| lpxD                  | UDP-3-O-[3-hydroxymyristoyl] glucosamine N-acyltransferase                                      |
| lpxH                  | UDP-2,3-diacetylglucosamine hydrolase                                                           |
| lsgF                  | putative UDP-galactose--lipooligosaccharide galactosyltransferase                               |
| manA                  | mannose-6-phosphate isomerase                                                                   |
| mrsA/glmM             | phosphoglucosamine mutase                                                                       |
| msbA                  | lipid A, export ABC transporter ATP-binding protein                                             |
| msbB                  | lipid A biosynthesis (KDO)2-(lauroyl)-lipid IVA acyltransferase                                 |
| mutS                  | methyl-directed mismatch repair, recognize exocyclic adducts of guanosine                       |
| nanE                  | Sialic acid catabolism, which confers advantage in mucus intestine                              |
| neuB                  | N-acetyl neuramic acid synthetase                                                               |
| oapA                  | opacity associated protein                                                                      |
| ompA/ompP5            | major outer membrane protein homolog, OmpA2, hemagglutinin antigen                              |
| opsX/rfaC             | ADP-heptose--lipooligosaccharide heptosyltransferase 1                                          |
| orf 4 E. coli 536     | Involved in horizontal gene transfer                                                            |
| orf 7 E. coli 536     | Involved in horizontal gene transfer                                                            |
| orf16 E. coli 536     | Putative F17-like fimbrial isher                                                                |
| orf17 S. flexneri R27 | methyltransferase homologue to ybeA/ydjA                                                        |
| orf18 S. flexneri R27 | transcriptional regulator, homologue to ybdA/yeaA                                               |
| orf45 E. coli 536     | putative lysil-tRNA synthetase LysU                                                             |
| orf70 E. coli 536     | Involved in horizontal gene transfer                                                            |
| orfM                  | non-canonical purine NTP pyrophosphatase, rdgB/HAM1 family                                      |
| pgi                   | glucose-6-phosphate isomerase                                                                   |
| pilB                  | putative type IV fimbrial biogenesis secretion protein                                          |
| radC                  | DNA repair protein RadC                                                                         |

|           |                                                                                                       |
|-----------|-------------------------------------------------------------------------------------------------------|
| relA      | GTP pyrophosphokinase                                                                                 |
| rfaD      | ADP-L-glycero-D-mannoheptose-6-epimerase                                                              |
| rfaE      | ADP-heptose synthase, bifunctional heptose 7-phosphate kinase/heptose 1-phosphate adenylyltransferase |
| rfaF      | ADP-heptose-LPS heptosyltransferase II                                                                |
| rtxB      | RTX toxin transporter, ABC-type bacteriocin/lantibiotic exporter                                      |
| sigA      | Mycobacterium tuberculosis H37Rv                                                                      |
| sitA      | Sallmonella iron transporter fur regulated                                                            |
| sitB      | Sallmonella iron transporter fur regulated                                                            |
| sitC      | Sallmonella iron transporter fur regulated                                                            |
| ssb       | ssDNA-binding protein controls activity of RecBCD nuclease                                            |
| tetA(B)   | tetracycline resistance protein TetA(B)                                                               |
| tetC      | putative transcriptional regulator                                                                    |
| tetD      | putative transcriptional regulator                                                                    |
| tetR      | tet repressor                                                                                         |
| tuf       | elongation factor Tu                                                                                  |
| VC1777    | sialic acid-specific subfamily of TRAP transporters                                                   |
| VC1779    | sialic acid-specific subfamily of TRAP transporters                                                   |
| waaC      | heptosyltransferase I                                                                                 |
| wbfV/wcvB | Predicted UDP-glucose 6-dehydrogenase                                                                 |
| wecA      | PII uridylyl-transferase, undecaprenyl-phosphate alpha-N-acetylglucosaminyl 1-phosphate transferase   |
| y1079     | DNA-polymerase repair proteins                                                                        |
| ybeB/ydjA | Ribosomal silencing factor RsfS                                                                       |
| ybfA/ydhA | sodium/glutamate symporter                                                                            |
| yhxB/manB | phosphomannomutase                                                                                    |

---
